# Supplementary material for: Prostacyclin Analogue–Loaded Nanoparticles Attenuate Myocardial Ischemia/Reperfusion Injury in Rats
Source: PubMed Central journal article supplement — JACC Basic Transl Sci. 2019 May 8;4(3):318–31. doi: 10.1016/j.jacbts.2018.12.006 (PMC6609885; doi:10.1016/j.jacbts.2018.12.006), 2019-05-08

1 **METHODS**

2

3 The institutional ethics committee approved all experimental procedures. Animal care was  
4 conducted humanely in compliance with the Principles of Laboratory Animal Care (1).

5

6 **ONO-1301NPs STABILITY IN ARTIFICIAL PLASMA**

7 Artificial plasma [Dulbecco's phosphate-buffered saline (DPBS), calcium, magnesium;  
8 Manufacturer: Thermo; Buffer containing DPBS, Ca, Mg: solution not containing protein,  
9 enzymes or lipids] was cultured at 37°C for 72 h, and ONO-1301 was separated from the ONO-  
10 1301NPs preparation by ultrafiltration [Stirring cell Model 8003, Manufacturer: Merck,  
11 Ultrafiltration membrane: cutoff molecular weight 300 kDa, room temperature (20~25°C),  
12 overnight (16 h) ultrafiltration process]. After deproteinization, each fraction was then  
13 measured with methanol using high performance liquid chromatography (HPLC). The results  
14 confirmed approximately 7% free ONO-1301. Lipoprotein lipase (Brand name: Lipoprotein  
15 lipase, Manufacturer: Fujifilm, Wako Pure Chemical Corporation) was cultured as the lipase  
16 enzyme, with an enzyme concentration of 10,000 units/mL (8.3 mg/mL) at 37°C for 72 h, and  
17 then separated and measured using HPLC following a previously described method (2). The  
18 results confirmed approximately 55% free ONO-1301. However, separation of ONO-1301 due  
19 to ONO-1301NPs breakdown could not be confirmed with phospholipase A2 processing even  
20 after 72 h.

21

22 **MEASUREMENT OF ONO-1301 CONCENTRATIONS IN PLASMA AND HEART.** The

23 rats from the ONO-solution and ONO-nanoparticle (NP) groups (**n = 9 each**) were humanely  
24 sacrificed to sample the plasma and the heart, which was divided into ischemic and non-  
25 ischemic parts, at 8 and 24 h after the reperfusion. The plasma was stored at -80 °C, and the

26 heart was thoroughly washed with phosphate-buffered saline and stored at  $-80^{\circ}\text{C}$  until HPLC–  
27 tandem mass spectrometry analysis (3) to measure ONO-1301 concentrations in the plasma and  
28 each part of the heart. The half-life of ONO-1301NPs was calculated using Phoenix WinNonlin  
29 version 7.0 (Certara L.P.).

30

31 **INJECTION AND ANALYSIS OF FLUORESCENTLY LABELED NPS.** The rats injected  
32 with fluorescently labeled NPs were humanely sacrificed 24 h after the injection. The harvested  
33 hearts were fixed with 4% paraformaldehyde and then embedded in OCT Compound and frozen  
34 under liquid nitrogen. Cryosections (5  $\mu\text{m}$ ) of a heart sample were analyzed by confocal  
35 microscopy (FLUOVIEW FV10i; Olympus, Tokyo, Japan).

36

37 **EX VIVO MAGNETIC RESONANCE IMAGING.** The rats injected with Gadolisome or  
38 saline were anesthetized 24 h after the injection, and the anterior aspect of the rib cage was  
39 removed to obtain a clear view of the heart and great vessels. Then, an 18-gauge perfusion  
40 needle was passed through the ascending aorta to inject 4% paraformaldehyde into the heart  
41 after clamping the ascending aorta. The perfusion-fixed heart was excised and immersed in 4%  
42 paraformaldehyde. *Ex vivo* magnetic resonance imaging scanning of the excised rat heart was  
43 performed using an 11.7 Tesla vertical bore scanner (AVANCE II 500WB; Bruker BioSpin,  
44 Ettlingen, Germany) with a 15-mm inner diameter volume coil (4).

45

46 **[ $^{13}\text{N}$ ]-AMMONIA POSITRON EMISSION TOMOGRAPHY.** The rats from the Sham ( $n =$   
47 4), Vehicle ( $n = 4$ ), ONO-solution ( $n = 6$ ), and ONO-NP ( $n = 6$ ) groups were anesthetized with  
48 2% isoflurane plus 100% oxygen at 2 L/min, and a Terumo 24-gauge indwelling cannula was  
49 inserted into the tail vein for [ $^{13}\text{N}$ ]-ammonia myocardial perfusion for a positron emission  
50 tomography (PET)–computed tomography (CT) (Inveon MM; Siemens Medical Solutions,

51 Knoxville, Tennessee) study (5). The rats were placed in a feet-first prone position on the  
52 scanner warming bed. At rest,  $37.1 \pm 6.4$  MBq of [ $^{13}\text{N}$ ]-ammonia was injected via the tail vein,  
53 followed by a 0.75-mL saline flush. Dynamic imaging data acquisition started simultaneously  
54 with the injection and extended for 10 min. Fifteen minutes later, a selective adenosine  $A_{2A}$   
55 receptor agonist (CGS-21680, 5  $\mu\text{g}/\text{kg}$ ; Abcam, Cambridge, Massachusetts) was injected to  
56 induce a hyperemic state (6). Five minutes after the adenosine injection,  $72.0 \pm 12.5$  MBq of  
57 [ $^{13}\text{N}$ ]-ammonia was injected, and stress dynamic imaging data were similarly acquired for 10  
58 min. The CT data were acquired at a tube voltage of 80 kVp and current of 140  $\mu\text{A}$  for scatter  
59 and attenuation correction before and after PET image acquisition. The systemic heart rate and  
60 blood pressure were measured indirectly using a noninvasive system (BP-98A-L; Softron,  
61 Japan) and a tail-cuff method.

62 The acquired PET–CT data was reconstructed using three-dimensional ordered-subset  
63 expectation maximization, followed by maximum a posteriori reconstruction (OSEM3D-MAP,  
64 16 subsets, 2 OSEM3D, and 18 MAP iterations) with attenuation and scatter correction. The  
65 image matrix and voxel size were  $128 \times 128 \times 159$  and  $0.776 \times 0.776 \times 0.796$  mm, respectively.  
66 Volumes of interest were semi-automatically generated on the left and right ventricles using the  
67 PMOD software, version 3.604 (PMOD Technologies, Ltd., Zurich, Switzerland). The  
68 myocardium volumes of interest were segmented into 17 American Heart Association segments  
69 (7). The myocardial blood flow (MBF) of each segment was calculated using the one-tissue  
70 compartment model (8). Regional MBF was categorized as infarct, border, and remote region  
71 MBF according to the area of the ischemic insult (Online Figure 1B).

72

73 **ENZYME-LINKED IMMUNOSORBENT ASSAY AND TRIPHENYLTETRAZOLIUM**  
74 **CHLORIDE–EVANS BLUE STAINING.** Twenty-four h after myocardial  
75 ischemia/reperfusion, the rats were sacrificed to obtain blood samples for analyzing plasma

76 troponin I and the hearts for measuring the infarct size (Sham, **n = 12**; Vehicle, **n = 11**; ONO-  
77 solution, **n = 13**; ONO-NP, **n = 12**). The heart and femoral vein were exposed under general  
78 anesthesia and mechanical ventilation. First, 2 mL of blood was sampled from the femoral vein.  
79 The plasma was separated by centrifugation of the blood samples at 3,000 rpm for 10 min and  
80 stored at  $-80^{\circ}\text{C}$ . Cardiac troponin I was analyzed using a rat cardiac troponin I enzyme-linked  
81 immunosorbent assay kit (Life Diagnostics, Inc., West Chester, Pennsylvania) (9). Subsequently,  
82 1.5 mL of 2% Evans Blue (Sigma–Aldrich, St. Louis, Missouri) was injected through the  
83 femoral vein immediately after re-occlusion of left anterior descending artery with the suture  
84 left *in situ*. The heart was then excised and cut parallel to the apex-base axis into three segments,  
85 which were incubated with 4% triphenyltetrazolium chloride (Sigma–Aldrich). The segment at  
86 the papillary muscle level was selected for evaluation. The area at risk of infarction (negative  
87 for Evans Blue), infarct area (negative for triphenyltetrazolium chloride), and the whole left  
88 ventricular area were assessed using a Leica M205FA fluorescence stereo microscope (Leica  
89 Microsystems, Wetzlar, Germany) in a blind manner. The infarct size (%) was calculated as  
90  $(\text{infarct area}/\text{area at risk of infarction}) \times 100$  (10).

91

92 **HISTOLOGY AND IMMUNOHISTOLABELING.** The heart samples excised 24 h after  
93 reperfusion were fixed with 10% buffered formalin and embedded in paraffin (Sham, **n = 10**;  
94 Vehicle, **n = 9**; ONO-solution, **n = 13**; ONO-NP, **n = 11**). Slices (5  $\mu\text{m}$ ) of the paraffin-embedded  
95 sections were stained with periodic acid-Schiff to examine the degree of cardiomyocyte  
96 hypertrophy by optical microscopy (Leica). Myocyte sizes were determined by drawing point-  
97 to-point perpendicular lines across a cross-sectional area of the cell at the level of the nucleus.  
98 The heart sections were also stained with a rabbit polyclonal antibody to the von Willebrand  
99 factor (1:200, DAKO, Glostrup, Denmark) and a mouse monoclonal antibody to alpha-smooth  
100 muscle actin (1:50, DAKO) to assess the capillary density and capillary area, respectively. The

101 capillary density was calculated as the number of positively stained capillaries, while the  
102 capillary area was calculated as the total capillary area divided by the capillary number.  
103 Furthermore, the sections were stained with hematoxylin and eosin. The number of  
104 polymorphonuclear leukocytes per high-power field was calculated as an indication of the  
105 degree of acute myocardial inflammation (10). These quantitative morphometric values were  
106 obtained from 10 randomly selected fields of the area at risk of infarction in each section and  
107 analyzed using the Metamorph software (Molecular Devices, Sunnyvale, California) (11).

108

109 **REAL-TIME POLYMERASE CHAIN REACTION.** The border areas of the excised heart  
110 samples (Sham, **n = 10**; Vehicle, **n = 9**; ONO-solution, **n = 13**; ONO-NP, **n = 11**) were immersed  
111 in RNA later (Thermo Fisher Scientific, Waltham, Massachusetts). Total RNA was isolated  
112 from the border area using the RNeasy kit (Qiagen, Hilden, Germany) and then reverse-  
113 transcribed using the Omniscript reverse transcriptase (Qiagen). Real-time polymerase chain  
114 reaction was performed using the TaqMan gene expression assay master mix (Thermo Fisher  
115 Scientific) on a 7500 Fast real-time polymerase chain reaction system (Thermo Fisher  
116 Scientific). The following genes were analyzed using TaqMan gene expression assays (Thermo  
117 Fisher Scientific): *Vegf* (Rn01511601\_m1), hepatocyte growth factor (Rn00566673\_m1),  
118 platelet-derived growth factor- $\beta$  (Rn01502596\_m1), angiopoietin-1 (*Ang-1*, Rn00585552\_m1),  
119 stromal cell-derived factor-1 (Rn00573260\_m1), interleukin-1 $\beta$  (Rn00580432\_m1),  
120 interleukin-6 (Rn01410330\_m1), and tumor necrosis factor- $\alpha$  (Rn01525859\_g1).  
121 Glyceraldehyde-3-phosphate dehydrogenase (Rn01775763\_g1) was coamplified as an internal  
122 control. Relative gene expression was determined using the  $\Delta\Delta\text{Ct}$  method.

123

124 **REFERENCES**

125

- 126 **1.** Carbone L. Pain management standards in the eighth edition of the Guide for the Care and  
127 Use of Laboratory Animals. *J Am Assoc Lab Anim Sci* 2012;51:322–8.
- 128 **2.** Morita SY, Ueda K, Kitagawa S. Enzymatic measurement of phosphatidic acid in cultured  
129 cells. *J Lipid Res* 2009;50:1945–52.
- 130 **3.** Saini GS, Wani TA, Gautam A, et al. Validation of the LC-MS/MS method for the  
131 quantification of mevalonic acid in human plasma and determination of the matrix effect. *J*  
132 *Lipid Res* 2006;47:2340–5.
- 133 **4.** Mori Y, Chen T, Fujisawa T, et al. From cartoon to real time MRI: in vivo monitoring of  
134 phagocyte migration in mouse brain. *Sci Rep* 2014;4:6997.
- 135 **5.** Bao Q, Newport D, Chen M, Stout DB, Chatziioannou AF. Performance evaluation of the  
136 inveon dedicated PET preclinical tomograph based on the NEMA NU-4 standards. *J Nucl Med*  
137 2009;50:401–8.
- 138 **6.** Kawamura M, Paulsen MJ, Goldstone AB, et al. Tissue-engineered smooth muscle cell and  
139 endothelial progenitor cell bi-level cell sheets prevent progression of cardiac dysfunction,  
140 microvascular dysfunction, and interstitial fibrosis in a rodent model of type 1 diabetes-induced  
141 cardiomyopathy. *Cardiovasc Diabetol* 2017;16:142.
- 142 **7.** Cerqueira MD, Weissman NJ, Dilsizian V, et al. Standardized myocardial segmentation and  
143 nomenclature for tomographic imaging of the heart. a statement for healthcare professionals  
144 from the Cardiac Imaging Committee of the Council on Clinical Cardiology of the American

145 Heart Association. *Circulation* 2002;105:539–42.

146 **8.** DeGrado TR, Hanson MW, Turkington TG, et al. Estimation of myocardial blood flow for  
147 longitudinal studies with <sup>13</sup>N-labeled ammonia and positron emission tomography. *J Nucl*  
148 *Cardiol* 1996;3:494–507.

149 **9.** Cheng K, Malliaras K, Li TS, et al. Magnetic enhancement of cell retention, engraftment,  
150 and functional benefit after intracoronary delivery of cardiac-derived stem cells in a rat model  
151 of ischemia/reperfusion. *Cell Transplant* 2012;21:1121–35.

152 **10.** Fukushima S, Coppens SR, Varela-Carver A, et al. A novel strategy for myocardial protection  
153 by combined antibody therapy inhibiting both P-selectin and intercellular adhesion molecule-1  
154 via retrograde intracoronary route. *Circulation* 2006;114:1251–6.

155 **11.** Shudo Y, Miyagawa S, Ohkura H, et al. Addition of mesenchymal stem cells enhances the  
156 therapeutic effects of skeletal myoblast cell-sheet transplantation in a rat ischemic  
157 cardiomyopathy model. *Tissue Eng Part A* 2014;20:728–39.

158

159 **ONLINE FIGURE LEGENDS**

160

161 **ONLINE FIGURE 1 Study Design**

162 **(A)** Study protocol. **(B)** Definition of the infarct, border, and remote areas.

163 LAD = left anterior descending artery; PBS = phosphate-buffered saline; NP = nanoparticle

164

165 **ONLINE FIGURE 2 Characteristics of NPs containing (A) Empty, (B) Fluorescently**  
166 **labeled, and (C) Gadolisome**

167 Average particle diameter was obtained by the dynamic light scattering method.

168 NP = nanoparticle; PDI = polydispersity index

169

170 **ONLINE FIGURE 3 Retention rate of ONO-1301 ( $\mu\text{g}$ )/lipids (mg) between 0 with 72 h**  
171 **after processing with (A) D-PBS, (B) Lipoprotein lipase, and (C) Phospholipase A2**

172 ONO-1301NPs undergoes hydrolysis by the lipase in plasma (mainly lipoprotein lipase) and  
173 the free ONO-1301 gradually separates. The separation rate of ONO-1301 through hydrolysis  
174 from ONO-1301NPs was 55% after 72 h, with 0 h data being 100%.

175 D-PBS = Dulbecco's phosphate-buffered saline

176

177 **ONLINE FIGURE 4 Changes in Plasma Levels of Radioactivity Upon Intravenous**  
178 **Administration of [ $^{14}\text{C}$ ]-ONO-1301 to Normal Male Rats (n = 4)**

179 Upon administration of 0.1, 0.3, 1.0, and 3.0 mg/kg [ $^{14}\text{C}$ ]-ONO-1301, the plasma levels of  
180 radioactivity increased in a dose-dependent-manner and showed linearity, without variation of  
181 the pharmacological half-time in each group. However, at a dose of 10 mg/kg, the plasma  
182 concentration revealed a prolonged half-life at an early period, and the area under the curve also  
183 increased more than expected, with a non-linear plasma concentration.



**ONLINE TABLE 1 Kinetic Parameters of Intravenous Administration of <sup>14</sup>C-ONO-1301 to Normal Male Rats (n = 4)**

| Dose<br>(mg/kg) | <i>AUC</i> (0 - ∞)<br>(ng eq · h/mL) | <i>T</i> <sub>1/2</sub> (2 - 15 min)<br>(min) | <i>T</i> <sub>1/2</sub> (2 - 6 h)<br>(h) | <i>CL</i> <sub>total</sub><br>(mL/h·kg) |
|-----------------|--------------------------------------|-----------------------------------------------|------------------------------------------|-----------------------------------------|
| 0.1             | 155.1 ± 19.8                         | 5.38 ± 0.47                                   | 2.31 ± 0.88                              | 653.7 ± 94.6                            |
| 0.3             | 578.4 ± 104.3                        | 5.67 ± 0.50                                   | 2.32 ± 0.27                              | 532.0 ± 90.9                            |
| 1.0             | 1,686.9 ± 124.6                      | 6.76 ± 0.81                                   | 1.84 ± 0.20                              | 595.4 ± 47.3                            |
| 3.0             | 4,781.4 ± 130.4                      | 7.31 ± 0.99                                   | 2.06 ± 0.39                              | 627.8 ± 17.6                            |
| 10              | 45,124.6 ± 5,555.1                   | 14.45 ± 2.01                                  | 1.96 ± 0.17                              | 224.4 ± 30.1                            |

Values are mean ± standard deviation.

*AUC* = area under the curve; *CL* = clearance; *T*<sub>1/2</sub> = elimination half-life.

### (A) Vehicle

| Average particle diameter (nm) | PDI   | Zeta potential (mV) | Lipids (mg/ml) |
|--------------------------------|-------|---------------------|----------------|
| 97.9                           | 0.051 | -17.9               | 42.0           |

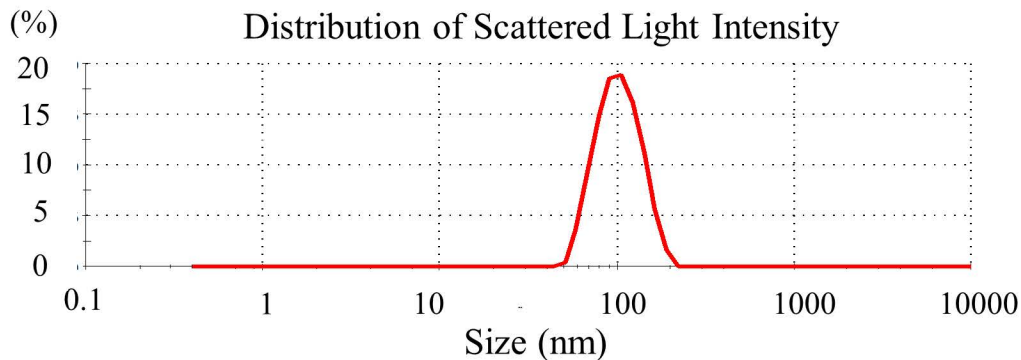

### (B) fluorescently labeled NP

| Average particle diameter (nm) | PDI   | Zeta potential (mV) | Lipids (mg/ml) |
|--------------------------------|-------|---------------------|----------------|
| 134                            | 0.194 | -24                 | 47.0           |

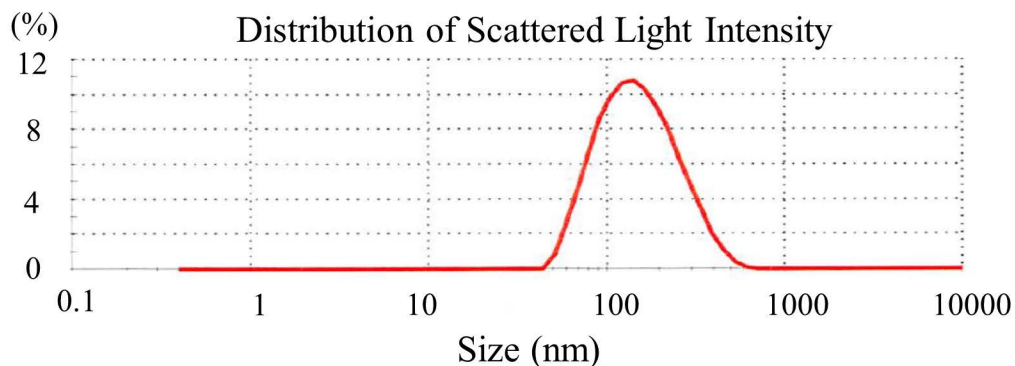

### (C) Gadolisome

| Average particle diameter (nm) | PDI   | Zeta potential (mV) | Lipids (mg/ml) |
|--------------------------------|-------|---------------------|----------------|
| 127.4                          | 0.126 | -50.5               | 22.7           |

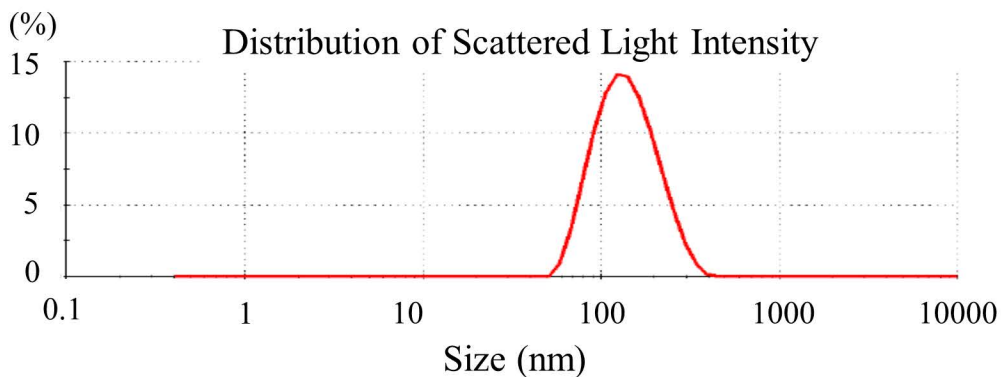

(A)

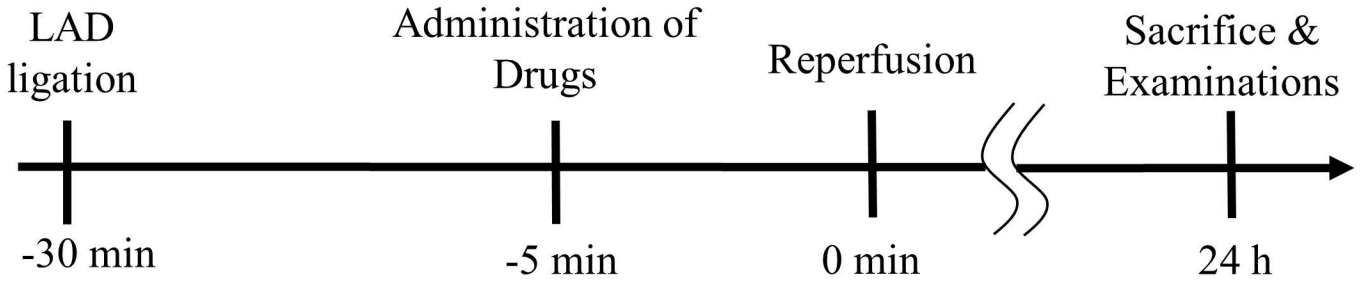

- PBS (5 mL/kg); Sham group
- NP alone (3 mg/kg); Vehicle group
- ONO-1301 solution (3 mg/kg); ONO-Solution group
- ONO-1301 NP (3 mg/kg); ONO-NP group

(B)

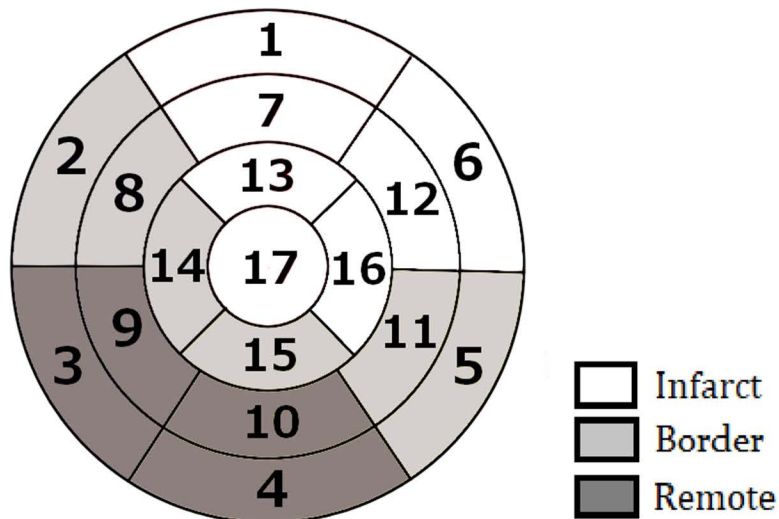

### (A) D-PBS processing

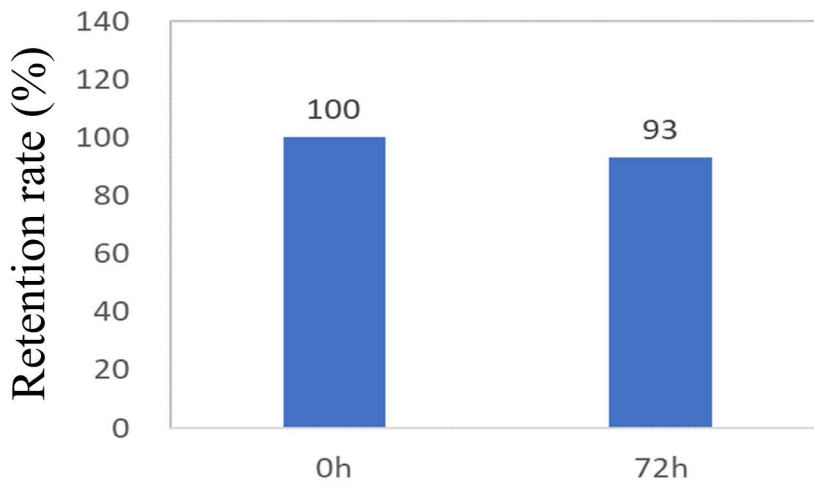

### (B) Lipoprotein lipase processing

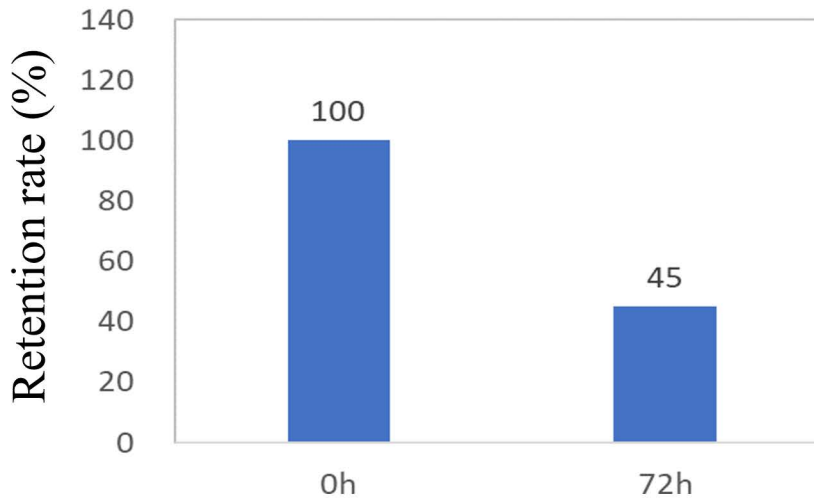

### (C) Phospholipase A2 processing

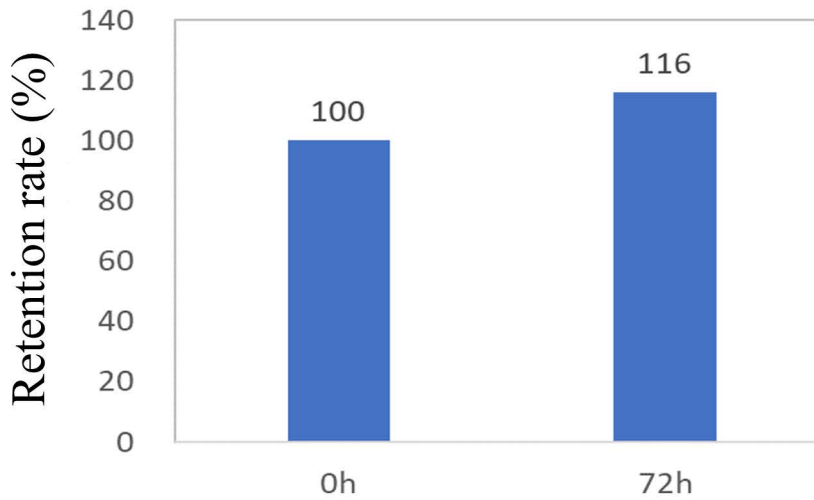

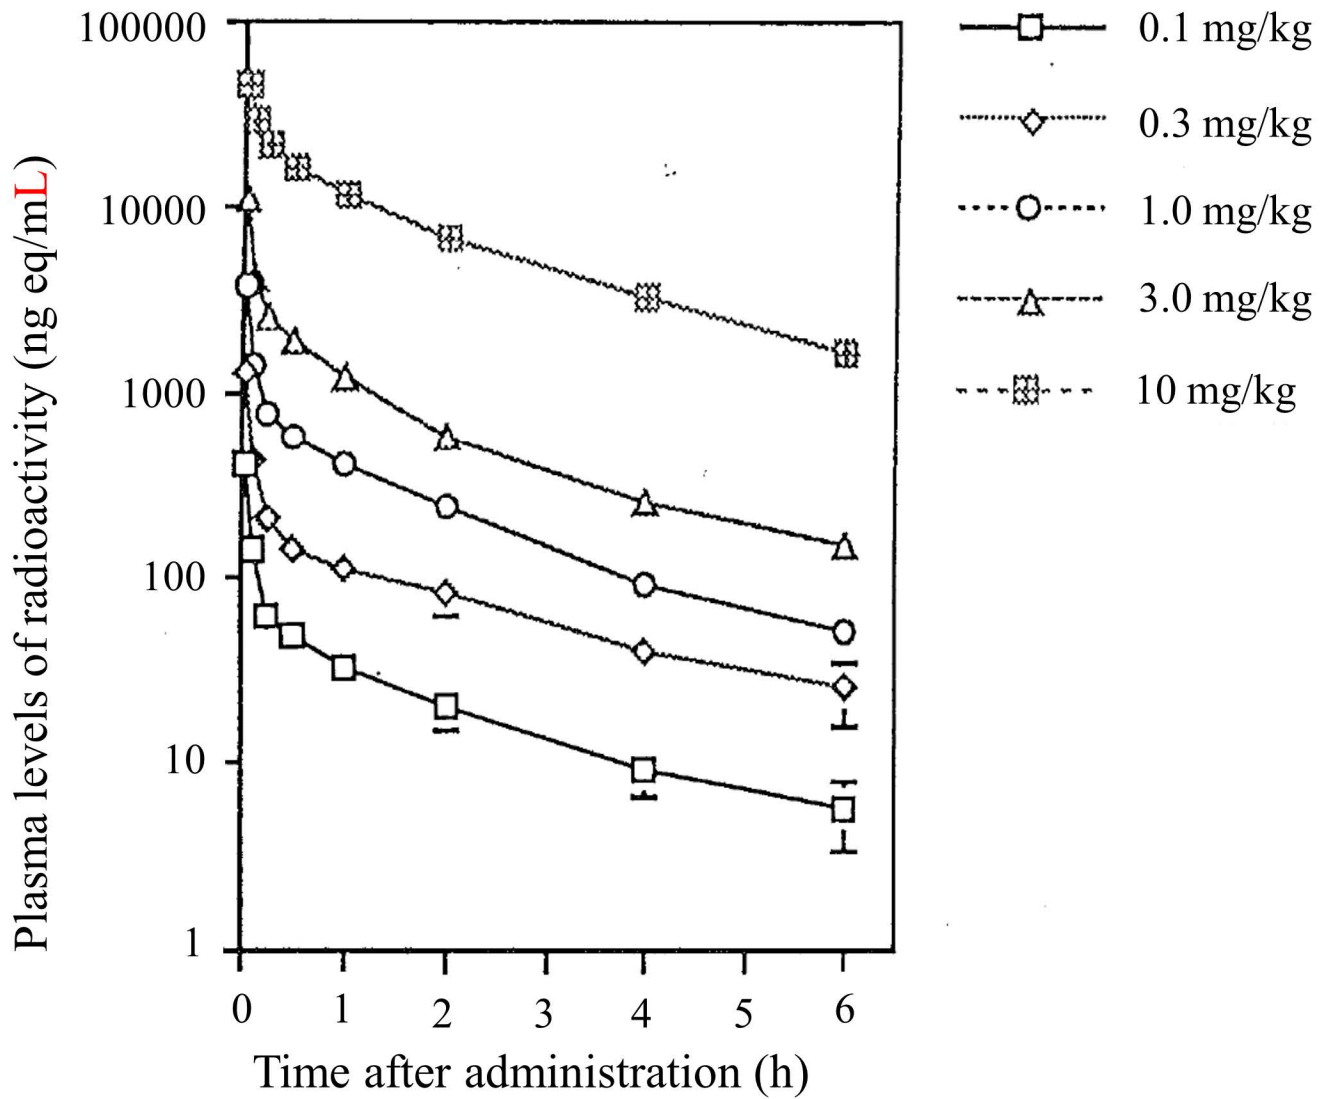

Supplement: mmc1.pdf [file mmc1.pdf]
